# Supplementary material for: QTLs for Tolerance of Drought and Breeding for Tolerance of Abiotic and Biotic Stress: An Integrated Approach
Source: PubMed Central journal article supplement (PMC4196913; doi:10.1371/journal.pone.0109574), 2014-10-14
Supplement: pone.0109574.s001.pdf [file pone.0109574.s001.pdf]

| Chromosome | Marker    | Position | LogP (SD) | Favoured allele |
|------------|-----------|----------|-----------|-----------------|
| 1          | id1001073 | 7.7      | 19.3      | M               |
| 1          | id1003559 | 47.5     | 57.1      | M               |
| 1          | id1006772 | 72.3     | 15.1      | M               |
| 1          | id1004849 | 78.8     | 12.5      | M               |
| 1          | wd1001450 | 98.0     | 10.4      | S               |
| 1          | id1012784 | 108.9    | 10.1      | M               |
| 1          | id1014783 | 127.4    | 45.2      | M               |
| 1          | id1021344 | 154.1    | 21.2      | M               |
| 1          | id1010697 | 204.9    | 17.5      | M               |
| 2          | id2015558 | 111.7    | 20.7      | M               |
| 2          | id2015233 | 114.7    | 10.7      | M               |
| 3          | id3000019 | 0.0      | 124.9     | M               |
| 3          | id3000090 | 5.1      | 108.9     | M               |
| 3          | id3000757 | 19.5     | 150.0     | M               |
| 3          | id3000946 | 25.1     | 146.4     | M               |
| 3          | id3002606 | 55.0     | 50.0      | M               |
| 3          | id3002556 | 58.2     | 69.4      | M               |
| 3          | id3003294 | 72.2     | 56.5      | M               |
| 3          | id3005216 | 97.5     | 12.9      | M               |
| 3          | id3006808 | 116.8    | 36.0      | M               |
| 4          | id4009390 | 102.0    | 120.1     | M               |
| 5          | id5000045 | 0.0      | 14.0      | M               |
| 6          | id6000009 | 0.0      | 69.1      | M               |
| 6          | id6000859 | 12.5     | 71.7      | M               |
| 6          | id6001960 | 26.2     | 52.4      | M               |
| 6          | id6002884 | 35.9     | 65.3      | M               |
| 6          | id6004029 | 61.3     | 19.4      | M               |
| 6          | id6004850 | 75.3     | 69.3      | M               |
| 6          | id6006336 | 90.4     | 25.0      | M               |
| 6          | id6009055 | 96.1     | 15.2      | M               |
| 6          | id6014475 | 149.9    | 23.5      | M               |
| 7          | id7000063 | 0.0      | 3.0       | M               |
| 7          | id7000477 | 24.9     | 22.0      | M               |
| 7          | id7001246 | 47.3     | 25.1      | M               |
| 7          | id7002801 | 62.9     | 33.6      | M               |
| 7          | id7002848 | 64.8     | 38.6      | M               |
| 7          | id7004930 | 137.5    | 79.3      | M               |
| 7          | id7004343 | 151.5    | 127.1     | M               |
| 7          | id7003702 | 172.0    | 67.8      | M               |
| 8          | id8000011 | 17.2     | 16.5      | S               |
| 8          | id8000944 | 29.6     | 12.1      | S               |
| 8          | id8001604 | 36.3     | 11.0      | S               |
| 8          | id8006881 | 81.8     | 10.1      | S               |
| 9          | id9000064 | 0.0      | 89.4      | M               |
| 9          | id9001308 | 12.4     | 28.8      | M               |

|    |            |       |      |   |
|----|------------|-------|------|---|
| 10 | id10006250 | 69.3  | 44.9 | M |
| 12 | id12002057 | 0.0   | 97.2 | M |
| 12 | id12001582 | 13.8  | 44.2 | M |
| 12 | id12005428 | 37.6  | 20.1 | M |
| 12 | id12006198 | 44.7  | 75.4 | M |
| 12 | id12006515 | 49.9  | 51.3 | M |
| 12 | id12000292 | 87.8  | 33.1 | M |
| 12 | id12007577 | 127.0 | 58.3 | M |
| 12 | id12007161 | 137.9 | 39.8 | M |
| 12 | id12007988 | 161.9 | 20.0 | M |
| 12 | id12008347 | 170.3 | 14.9 | S |
| 12 | id12008700 | 176.1 | 10.9 | S |
| 12 | id12009243 | 193.8 | 11.8 | S |
| 12 | id12009407 | 200.5 | 16.8 | S |

---
