# Supplementary material for: QTLs for Tolerance of Drought and Breeding for Tolerance of Abiotic and Biotic Stress: An Integrated Approach
Source: PubMed Central journal article supplement (PMC4196913; doi:10.1371/journal.pone.0109574), 2014-10-14
Supplement: pone.0109574.s002.pdf [file pone.0109574.s002.pdf]

| Line                 | IRRI  |      |      |        |       |       | IRRI-SA |      |      |        |       |       |
|----------------------|-------|------|------|--------|-------|-------|---------|------|------|--------|-------|-------|
|                      | DTF-S | PH-S | GY-S | DTF-NS | PH-NS | GY-NS | DTF-S   | PH-S | GY-S | DTF-NS | PH-NS | GY-NS |
| IR 91648-B-117-B-1-1 | 81.9  | 77.0 | 2566 | 83     | 86    | 5309  | 92      | 92   | 4390 | 89     | 98    | 6835  |
| IR 91648-B-1-B-3-1   | 76.9  | 74.2 | 2449 | 77     | 100   | 6114  | 87      | 102  | 4875 | 89     | 107   | 7748  |
| IR 91648-B-238-B-1-1 | 81.0  | 81.0 | 2370 | 81     | 100   | 9605  | 92      | 97   | 4365 | 90     | 118   | 9031  |
| IR 91648-B-238-B-2-1 | 80.5  | 89.0 | 3153 | 83     | 104   | 6711  | 90      | 99   | 4999 | 92     | 119   | 10108 |
| IR 91648-B-319-B-2-1 | 81.5  | 83.8 | 2303 | 83     | 104   | 8483  | 93      | 102  | 5179 | 91     | 114   | 7348  |
| IR 91648-B-319-B-2-2 | 81.0  | 79.3 | 1690 | 84     | 95    | 8161  | 92      | 104  | 5431 | 91     | 119   | 10695 |
| IR 91648-B-31-B-1-1  | 81.7  | 77.3 | 2111 | 80     | 96    | 6036  | 86      | 92   | 4095 | 84     | 107   | 7592  |
| IR 91648-B-356-B-2-1 | 83.5  | 78.2 | 1955 | 83     | 104   | 10553 | 91      | 98   | 5073 | 91     | 118   | 8480  |
| IR 91648-B-59-B-1-1  | 81.6  | 79.8 | 2138 | 81     | 100   | 8040  | 91      | 101  | 5041 | 91     | 123   | 9574  |
| IR 91648-B-59-B-3-1  | 80.3  | 88.8 | 2669 | 83     | 95    | 7265  | 94      | 92   | 5143 | 91     | 119   | 9015  |
| IR 91648-B-59-B-7-1  | 81.5  | 79.8 | 2291 | 82     | 98    | 7499  | 90      | 97   | 4996 | 91     | 118   | 8678  |
| IR 91648-B-89-B-10-1 | 81.1  | 84.3 | 2165 | 85     | 96    | 8255  | 91      | 98   | 4267 | 90     | 114   | 9007  |
| IR 91648-B-89-B-1-1  | 81.6  | 81.2 | 2211 | 83     | 98    | 10111 | 90      | 96   | 4150 | 91     | 123   | 10189 |
| IR 91648-B-89-B-12-1 | 81.1  | 88.8 | 2006 | 83     | 104   | 9081  | 92      | 100  | 4665 | 106    | 120   | 9550  |
| IR 91648-B-89-B-3-1  | 81.4  | 76.2 | 1731 | 84     | 100   | 7143  | 91      | 97   | 4505 | 91     | 116   | 8026  |
| IR 91648-B-89-B-4-1  | 80.8  | 84.2 | 2059 | 83     | 106   | 7176  | 93      | 98   | 4542 | 93     | 115   | 9565  |
| IR 91648-B-89-B-8-1  | 80.1  | 85.3 | 2322 | 82     | 103   | 6036  | 91      | 102  | 5475 | 91     | 113   | 9546  |
| Swarna               | 105   | 56   | 0    | 95     | 91    | 6857  |         |      |      |        |       |       |
